# Supplementary material for: Exosomes with overexpressed miR 147a suppress angiogenesis and infammatory injury in an experimental model of atopic dermatitis
Source: PubMed Central journal article supplement (PMC10235063; doi:10.1038/s41598-023-34418-y), 2023-06-01

FIG4D

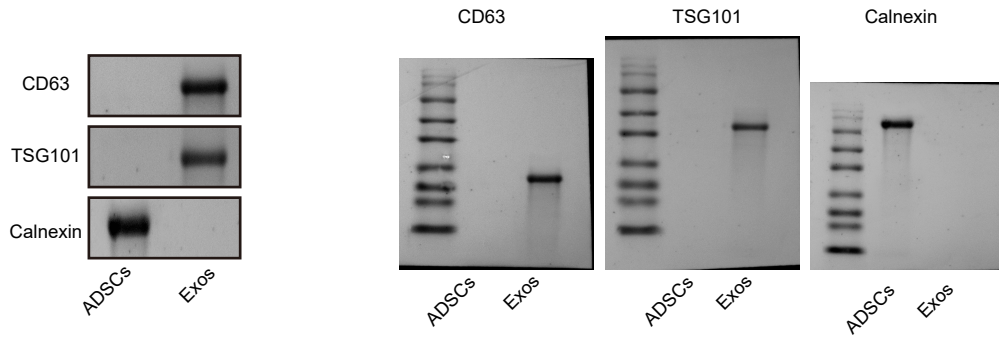

FIG7D

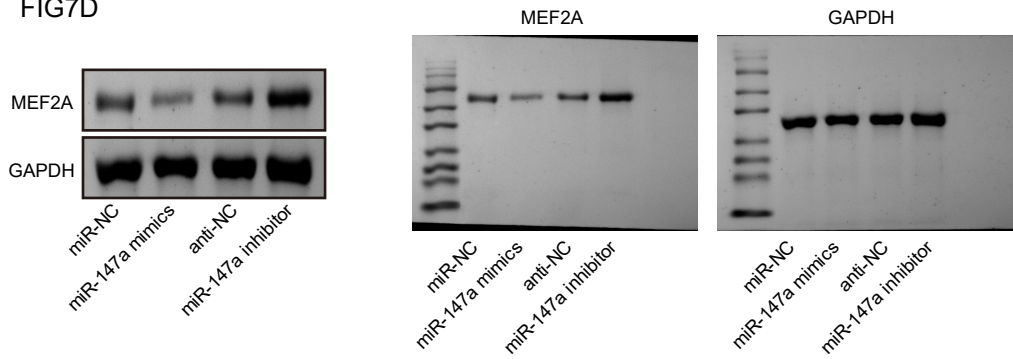

FIG7I

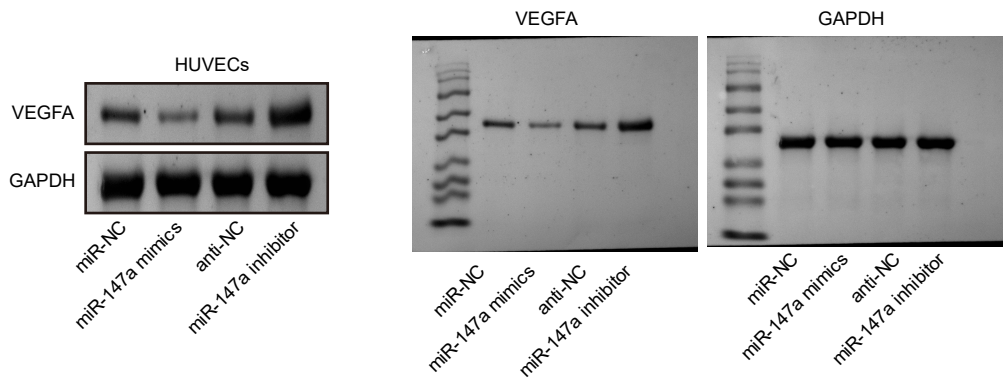

Supplement: 41598_2023_34418_MOESM1_ESM.pdf [file 41598_2023_34418_MOESM1_ESM.pdf]
